# Supplementary material for: Tecnical Note: Analysis of non-regulated vehicular emissions by extractive FTIR spectrometry: tests on a hybrid car in Mexico City
Source: Copernicus journal article supplement (doi:10.5194/acp-6-5339-2006), 2006-11-27
Supplement: Supplementary file 1 [file acp-6-5339-2006-supplement.zip]

Archive with 2 entries (2 files):
- acp-2006-0113-sp2.pdf
- acp-2006-0113-sp1.pdf
